# Supplementary material for: Structural basis of LAIR1 targeting by polymorphic Plasmodium RIFINs
Source: PubMed Central journal article supplement (PMC8270905; doi:10.1038/s41467-021-24291-6), 2021-07-09
Supplement: 41467_2021_24291_MOESM1_ESM.pdf [file 41467_2021_24291_MOESM1_ESM.pdf]

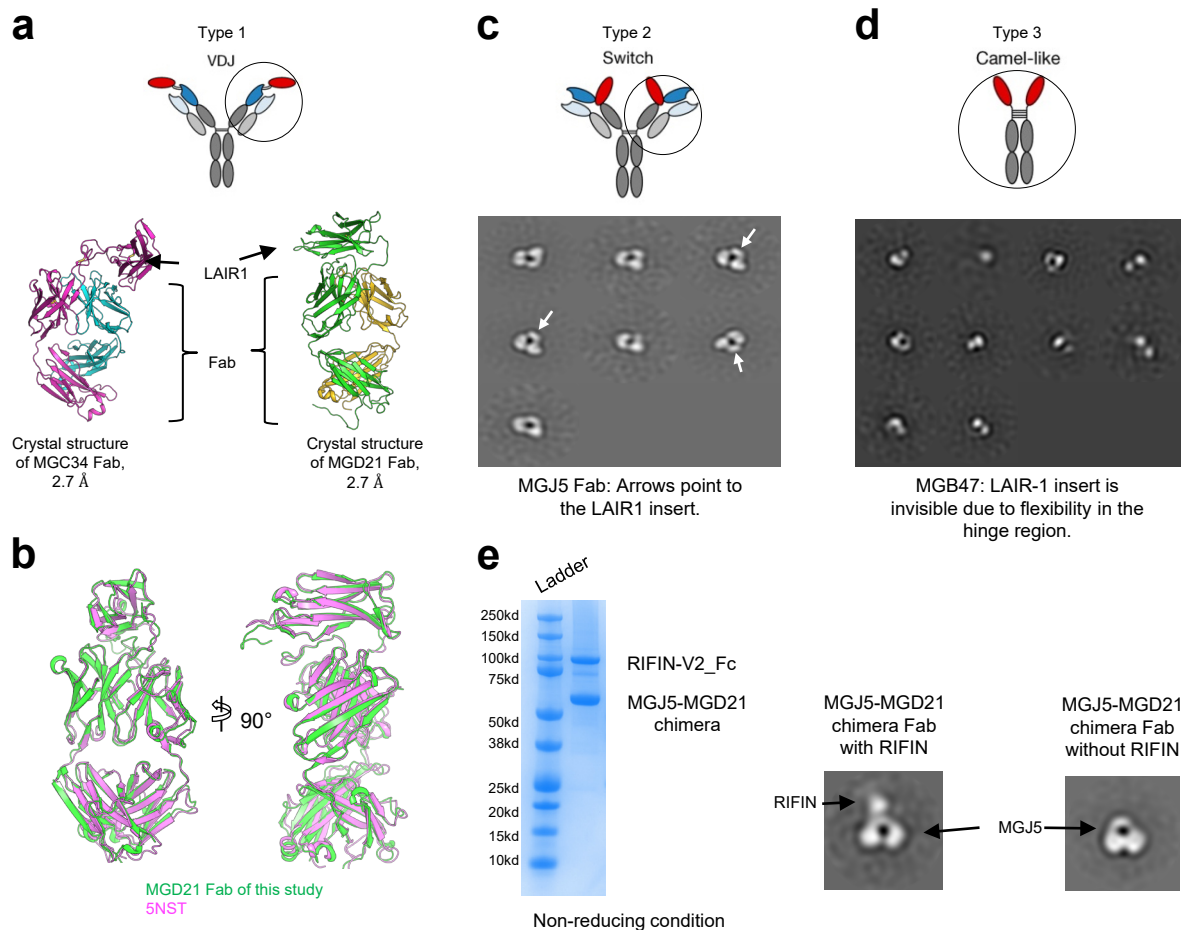

**Supplementary Fig. 1 Architectural diversity of LAIR1-inserted antibodies.** **a**, Crystal structure of two type 1 LAIR1-containing antibody Fab domains, including MGC34 and MGD21. **b**, Superimposition of MGD21 Fab structure with PDB ID 5NST. **c**, and **d**, ns-EM images of type 2 (MGJ5) and type 3 (MGB46) LAIR1-containing antibodies. **e**, Recognition of RIFIN by type 2 LAIR1 inserted antibodies MGJ5 and MGM1 chimera with MGD21-LAIR1 swapped in. nsEM image of MGJ5 chimera with or without RIFIN-V2 domain (PF3D7\_1040300) (right panel). The SDS-PAGE runs were repeated at least twice.

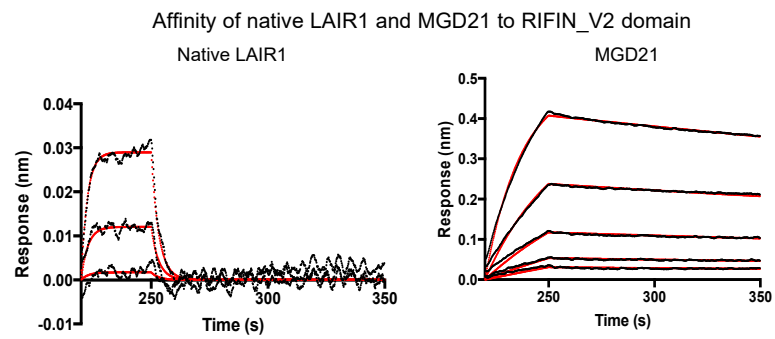

**Supplementary Fig. 2 RIFIN-V2 domain mediates LAIR1 binding.** Affinity of native and matured LAIR1 to RIFIN (PF3D7\_1040300) V2 domain.

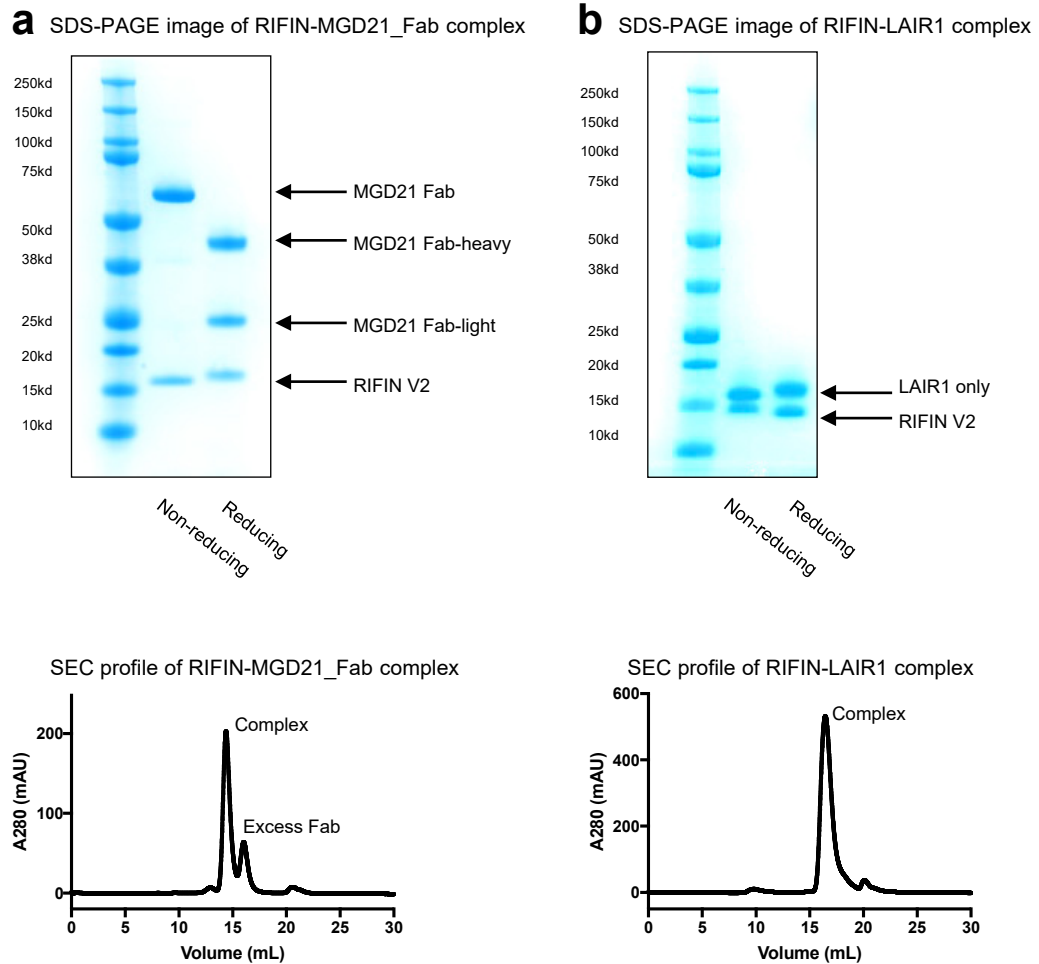

**Supplementary Fig. 3 Expression and purification of LAIR1 and RIFIN constructs.** **a**, Upper panel: SDS-PAGE image of RIFIN-MGD21\_Fab (PF3D7\_1400600) complex. Lower Panel: SEC profile of RIFIN-MGD21\_Fab (PF3D7\_1400600) complex. The SDS-PAGE runs were repeated at least twice. **b**, Upper panel: SDS-PAGE image of LAIR1-RIFIN (PF3D7\_1040300) complex. Lower Panel: SEC profile of LAIR1-RIFIN (PF3D7\_1040300) complex. The SDS-PAGE runs were repeated at least twice.

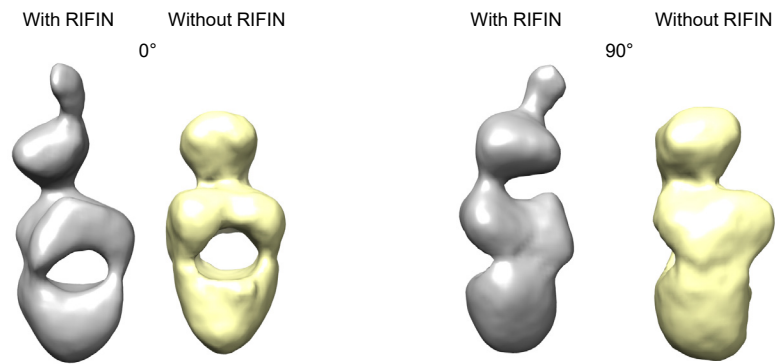

**Supplementary Fig. 4 3D reconstruction of nsEM image of MGD21 Fab alone and in complex with RIFIN-V2 (PF3D7\_1400600). Maps are superimposed to each other and shown in orthogonal views.**





**a**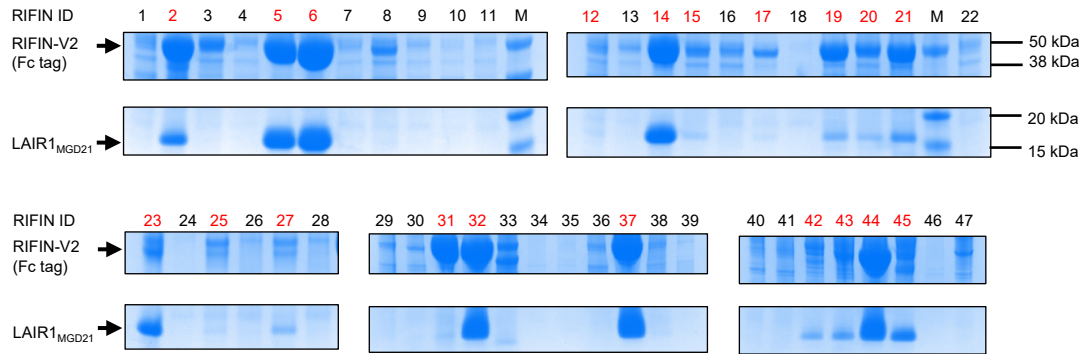**b**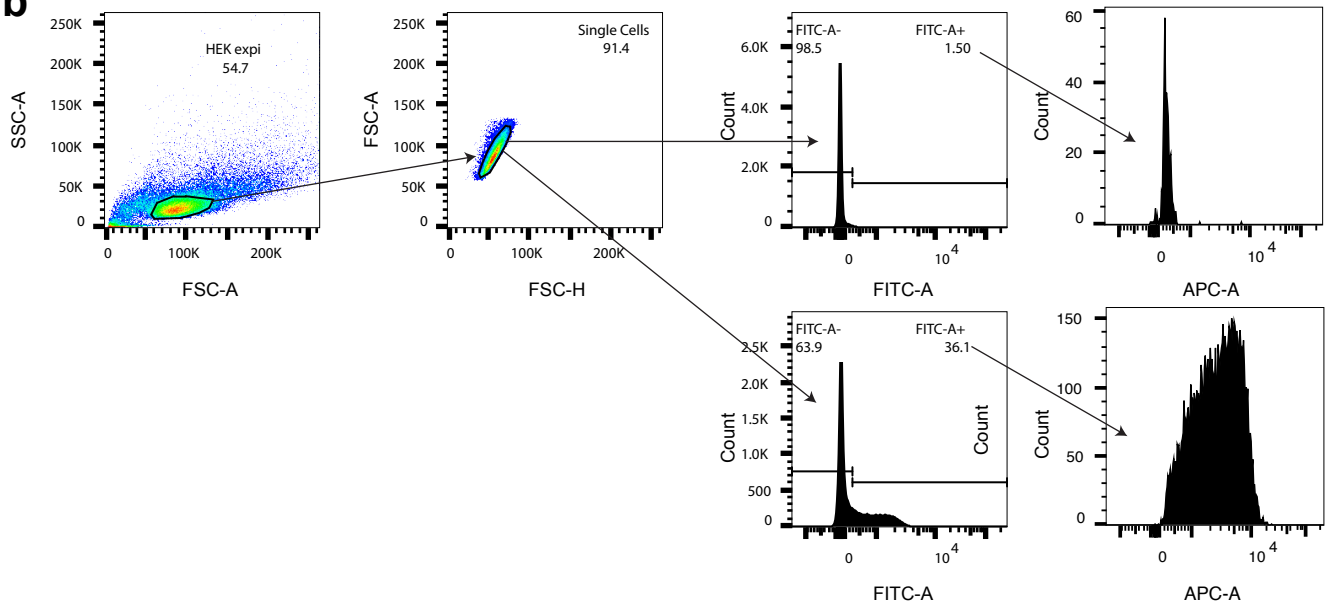

**Supplementary Fig. 7 Characterization of RIFIN-LAIR1/LILRB1 interaction.** **a**, Coomassie blue-stained SDS-PAGE to assess the co-IP between the LAIR1 domain of MGD21 and various RIFINs. (Related to Fig. 4c with additional Fc-tagged RIFIN-V2 bands shown) Positive LAIR1 binding RIFIN IDs are indicated in red. Lanes marked with “M” are molecular ladders with molecular weights as marked. The SDS-PAGE runs were repeated at least twice. **b**, Gating strategy to determine the percentage of RIFIN positive HEK cells (FITC-A + compartment) and RIFINs that binds to LAIR1 antibodies (APC-A compartment).
