# Supplementary material for: Structural basis of LAIR1 targeting by polymorphic Plasmodium RIFINs
Source: PubMed Central journal article supplement (PMC8270905; doi:10.1038/s41467-021-24291-6), 2021-07-09
Supplement: 41467_2021_24291_MOESM2_ESM.pdf [file 41467_2021_24291_MOESM2_ESM.pdf]

### **Description of Additional Supplementary Files**

File Name: Supplementary Data 1

Description: List of three-residue-signature matched RIFINs and their amino-acid sequences.
